# Supplementary material for: Enhanced detection of ascorbic acid with cascaded fluorescence recovery of a dual-nanoquencher system
Source: Royal Society of Chemistry journal article supplement (doi:10.1039/d2ay01019d), 2022-01-01
Supplement: d2ay01019d1.pdf [file d2ay01019d1.pdf]

## Supporting Information

### **Enhanced detection of ascorbic acid with cascaded fluorescence recovery of dual-nanoquenchers system**

Zhi-Ang Liu <sup>a</sup>, Ya-Nan Zuo <sup>c</sup>, Yinghui Xia <sup>c</sup>, Jing Sun <sup>b</sup>, Shuyun Zhu <sup>c\*</sup>

<sup>a</sup> TEM Laboratory, Experimental Teaching and Equipment Management Center, Qufu Normal University, Qufu City, 273165, Shandong, China.

<sup>b</sup> Qinghai Key Laboratory of Qinghai-Tibet Plateau Biological Resources, Northwest Institute of Plateau Biology, Chinese Academy of Sciences, Xining City, 810001, Qinghai, China.

<sup>c</sup> School of Chemistry and Chemical Engineering, Qufu Normal University, Qufu City, 273165, Shandong, China.

\* Corresponding author: E-mail: shuyunzhu1981@163.com (S. Zhu).

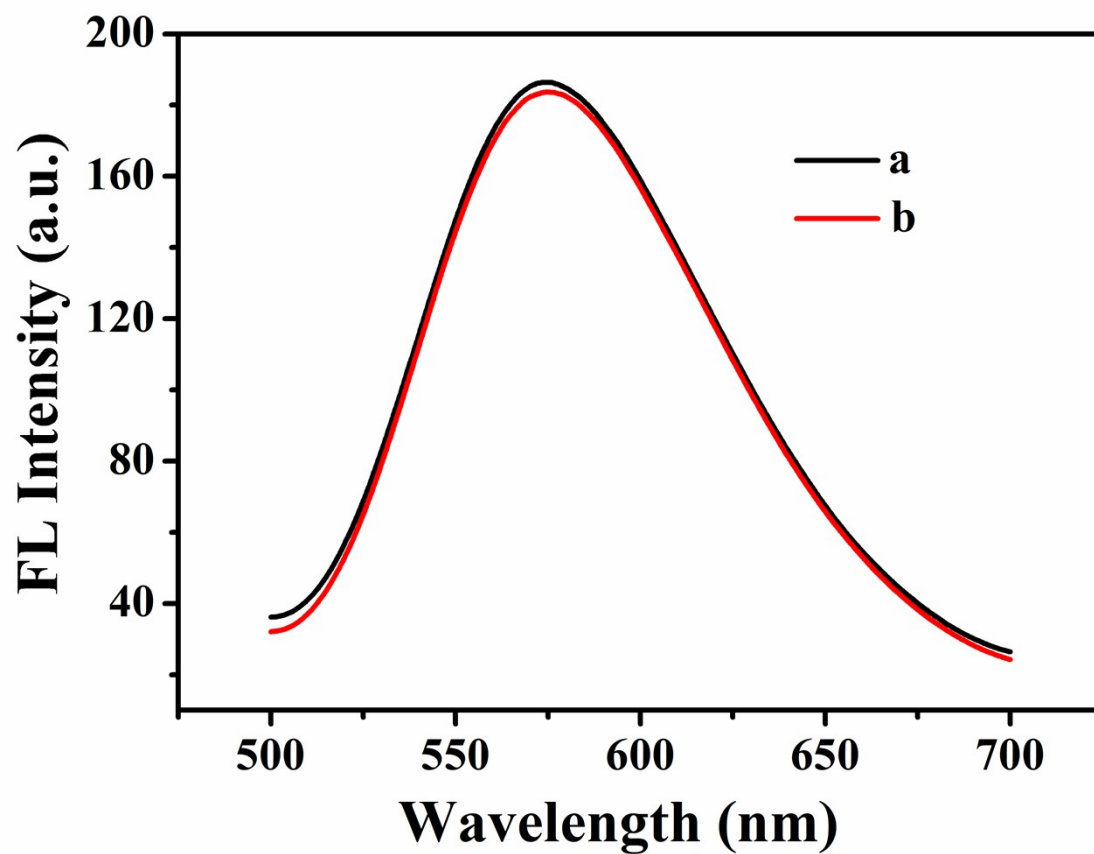

**Fig. S1** Fluorescence emission spectra of DAP-AuNPs system in the absence (a) and presence (b) of AA.

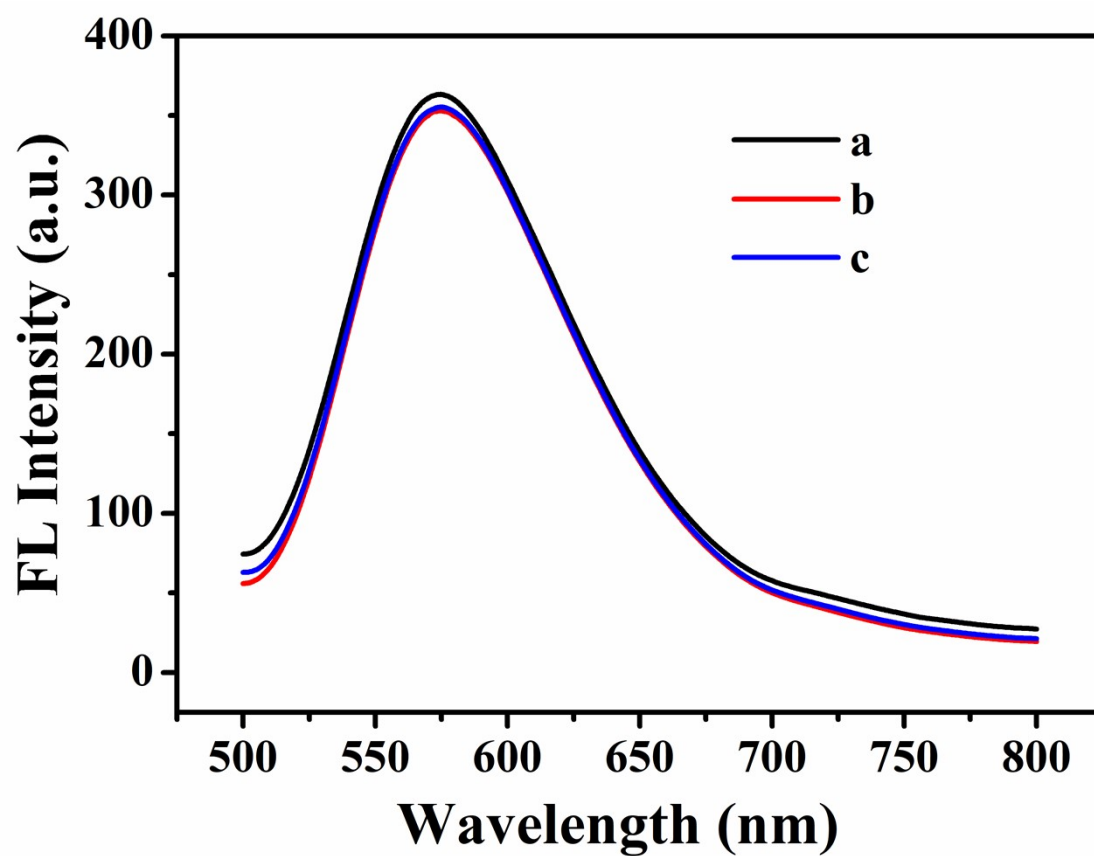

**Fig. S2** Fluorescence emission spectra of DAP in the absence (a) and presence of AA (b) and  $\text{Mn}^{2+}$  (c).

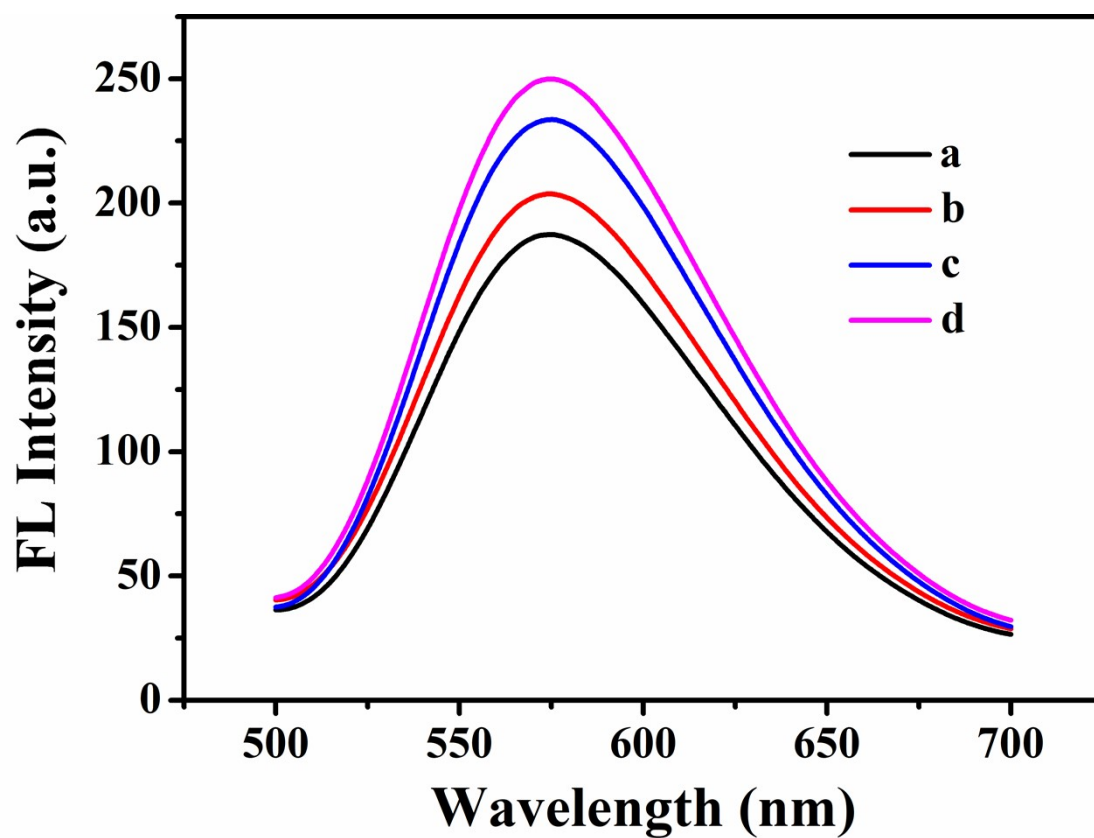

**Fig. S3** The fluorescence emission spectra of DAP-AuNPs system in presence of  $Mn^{2+}$  with different concentrations. (a) 0, (b) 40, (c) 100, (d) 500  $\mu M$ .

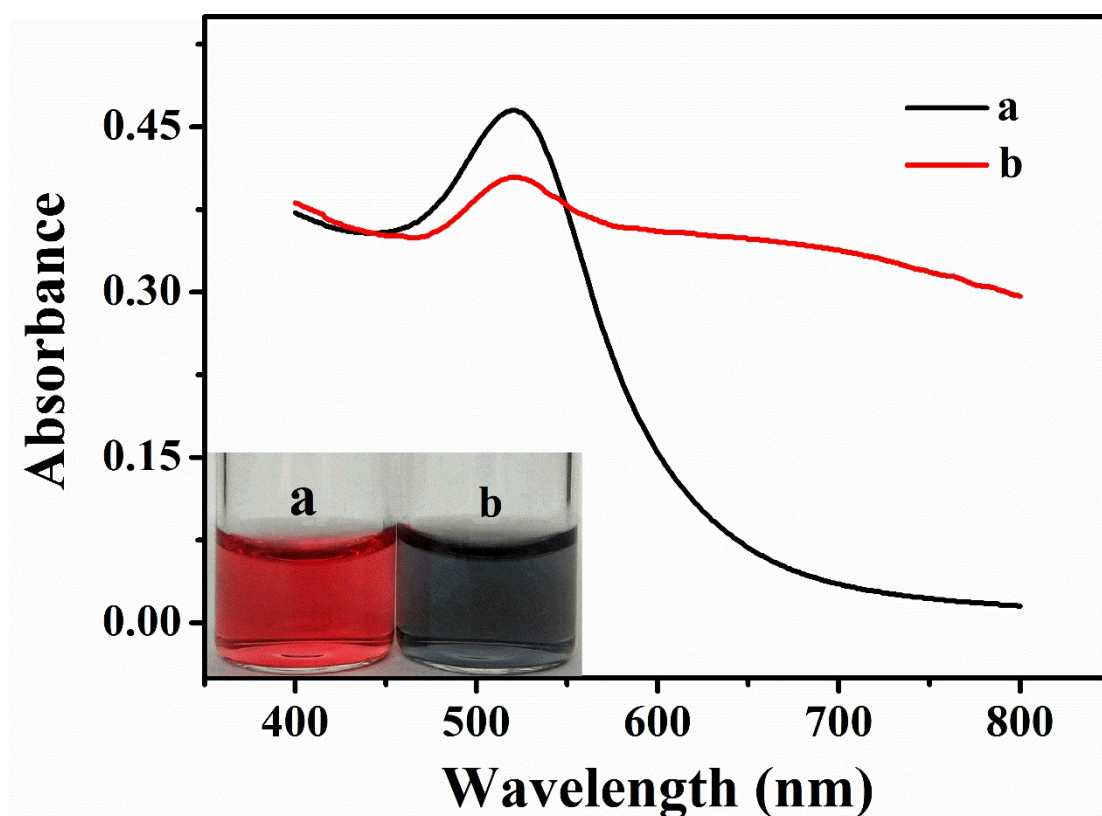

**Fig. S4** The UV-vis spectra of AuNPs in the absence (a) and presence of 20  $\mu\text{M}$   $\text{Mn}^{2+}$  (b). Inset: Corresponding digital photos.

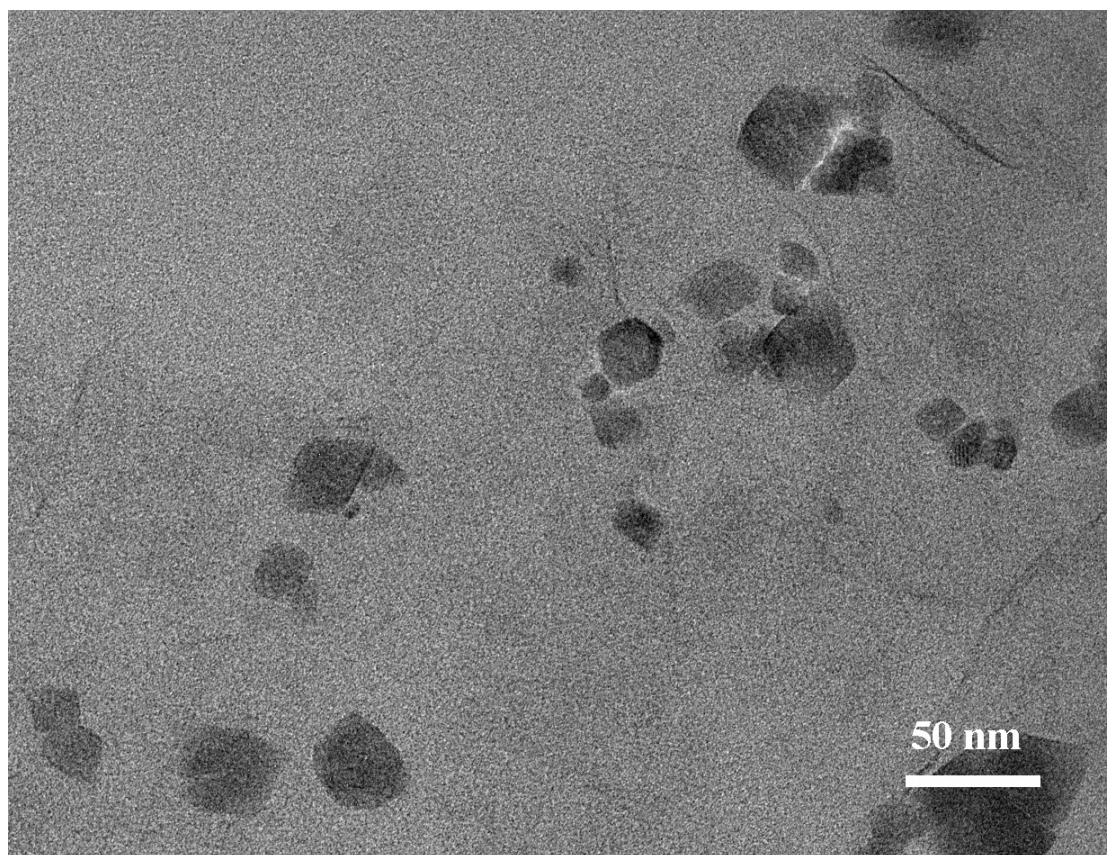

**Fig. S5** TEM image of MnO<sub>2</sub> nanosheets in the presence of AA.

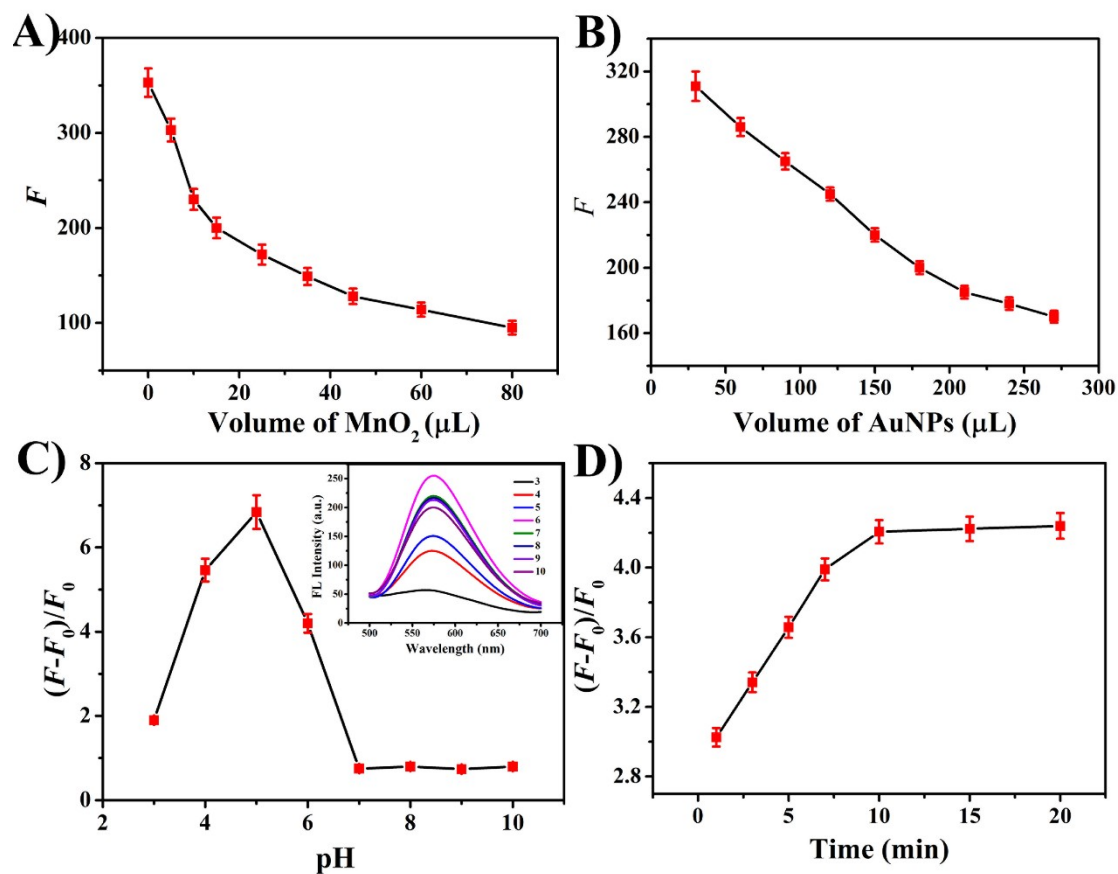

**Fig. S6** The effects of  $\text{MnO}_2$  volumes (**A**) and AuNPs amounts (**B**) on the fluorescence intensities of DAP. The effects of pH (**C**) and reaction time of AA with  $\text{MnO}_2$  (**D**) on the  $(F-F_0)/F_0$  of DAP- $\text{MnO}_2$ -AuNPs system, where  $F$  and  $F_0$  is the fluorescence of the DAP- $\text{MnO}_2$ -AuNPs system with and without AA, respectively. Inset of Fig. S5C: The corresponding fluorescence emissive spectra of DAP under different pH.

**Table S1** Comparison of the analytical performances of two approaches.

|                             | Linear range/ $\mu\text{M}$ | LOD/ $\mu\text{M}$ | Sensitivity ( $\mu\text{M}^{-1}$ ) |
|-----------------------------|-----------------------------|--------------------|------------------------------------|
| DAP-MnO <sub>2</sub>        | 0.5-50                      | 0.17               | 0.0119                             |
| DAP-MnO <sub>2</sub> -AuNPs | 0.02-1                      | 0.0067             | 0.835                              |
|                             | 1-50                        |                    | 0.0434                             |

**Table S2** Recovery test of AA in commercial fruit juices.

| Juice samples   | Present method (mg/100 mL) | Initial amount (mg/100 mL) | Added ( $\mu\text{M}$ ) | Founded ( $\mu\text{M}$ ) | Recovery (%) |
|-----------------|----------------------------|----------------------------|-------------------------|---------------------------|--------------|
| Orange juice    | 28.9                       | 30                         | 2                       | 1.91                      | 95.5         |
|                 |                            |                            | 15                      | 14.2                      | 94.7         |
|                 |                            |                            | 35                      | 36.5                      | 104.2        |
| Pineapple juice | 29.1                       | 30                         | 2                       | 1.95                      | 97.5         |
|                 |                            |                            | 15                      | 14.4                      | 96           |
|                 |                            |                            | 35                      | 33.2                      | 94.9         |
| Grape juice     | 18.5                       | 20                         | 2                       | 1.92                      | 96.0         |
|                 |                            |                            | 15                      | 15.8                      | 105.3        |
|                 |                            |                            | 35                      | 36.8                      | 105.1        |



**Table S3** Recovery test of AA in fresh fruit samples.

| Fruit samples | Present method<br>(mg/100 g) | Reference method<br>(mg/100 g) | Added<br>( $\mu$ M) | Founded<br>( $\mu$ M) | Recovery<br>(%) |
|---------------|------------------------------|--------------------------------|---------------------|-----------------------|-----------------|
| Pear          | 4.92                         | 5.13                           | 5                   | 4.76                  | 95.2            |
|               |                              |                                | 20                  | 21.1                  | 105.5           |
| Grape         | 6.32                         | 6.54                           | 5                   | 4.79                  | 95.8            |
|               |                              |                                | 20                  | 19.4                  | 97              |
| Orange        | 32.21                        | 34.53                          | 5                   | 4.86                  | 97.2            |
|               |                              |                                | 20                  | 20.8                  | 104             |
| Kiwi          | 37.63                        | 36.91                          | 5                   | 4.84                  | 96.8            |
|               |                              |                                | 20                  | 19.1                  | 95.5            |
